# Supplementary material for: 3D-Printed Flexible Penile Model Simulator for Plaque Incision and Graft for Peyronie's Disease
Source: PubMed Central journal article supplement — Sex Med. 2021 Feb 13;9(2):100318. doi: 10.1016/j.esxm.2020.100318 (PMC8072177; doi:10.1016/j.esxm.2020.100318), 2021-02-13
Supplement: mmc2.pdf [file mmc2.pdf]

Surgeon's name: \_\_\_\_\_

Hospital City: \_\_\_\_\_

Date: \_\_\_\_/\_\_\_\_/\_\_\_\_ (day/month/year)

Birthday: \_\_\_\_/\_\_\_\_/\_\_\_\_ (day/month/year)

Time to perform the plaque incision and graft using the 3D printed model: \_\_\_\_\_ min

Overall experience:

- Resident
- Fellow
- Expert Surgeon

Specific experience in Plaque incision and graft

- < 10 procedures / year
- 10 -20 procedures / year
- > 20 procedures / year

**(Likert scale) scale 0-5 (0=strongly disagree / 5 = strongly agree)**

Content Validity

1. Is there a role for a validated Peyronie's disease simulator for use in training?

0 1 2 3 4 5

2. Is simulation-based assessment and training for Peyronie's disease surgery essential for patient safety?

0 1 2 3 4 5

3. Plaque incision and graft (PIG) for Peyronie's disease is an effective method of treatment and training is a must?

0 1 2 3 4 5

4. After performing the simulation with the 3D model, you feel more confident to perform PIG to correct penile curvature.

0 1 2 3 4 5

5. Should the model be implemented as part of the surgeon's training to perform PIG?

0 1 2 3 4 5

---

**2.Please rank each item according your perception of the Peyronie's disease model**

**Point Likert Scale: (1: poor, 2: marginal, 3: moderate, 4: good, and 5: excellent)**

2.1.Realistic design

1 2 3 4 5

2.2.Anatomy

1 2 3 4 5

2.3.Texture

1 2 3 4 5

2.4.Steps of the procedure

a.Curvature measurement

1 2 3 4 5

b.Incision of the tunica albuginea

1 2 3 4 5

c.Preparation of the graft

1 2 3 4 5

d.Suturing the graft to the tunica albuginea

1 2 3 4 5

Usability and difficulty

---

**3.Please rank each item according your perception of the Peyronie's disease model**

3.1.Global difficulty (1 very easy to 5 very hard)

1 2 3 4 5

3.2.Usability (the ease of use and learnability of the model)

1 2 3 4 5

3.3.Overall experience

1 2 3 4 5
